# Supplementary material for: Successful high-level accumulation of fish oil omega-3 long-chain polyunsaturated fatty acids in a transgenic oilseed crop
Source: PubMed Central journal article supplement (PMC4253037; doi:10.1111/tpj.12378), 2013-11-08
Supplement: tpj0077-0198-SD1.pdf [file tpj0077-0198-SD1.pdf]

Fig. S1

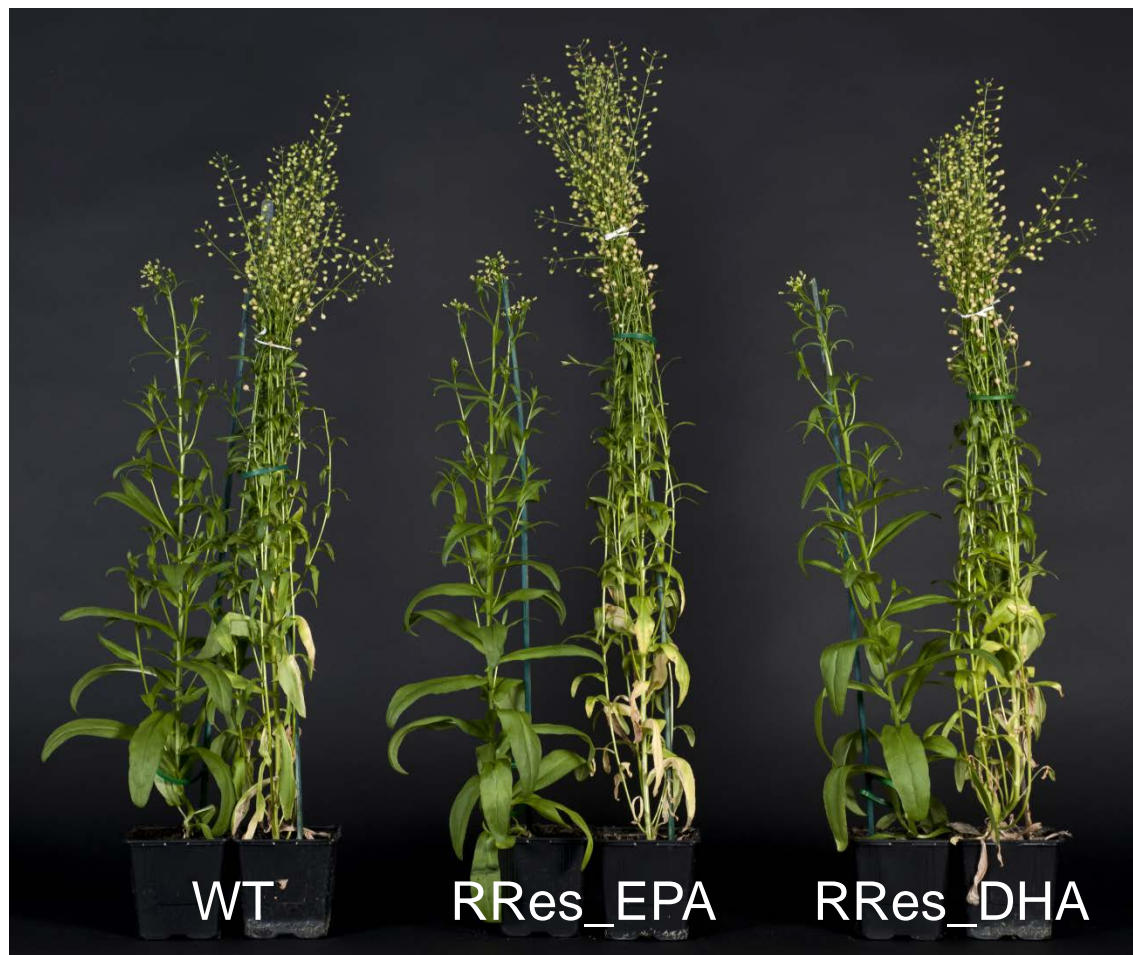

**Figure S1. A comparison of *C. sativa* wild type, RRes\_EPA and RRes\_DHA, six and ten weeks old respectively.**

No phenotypic differences are obvious

Fig S2.

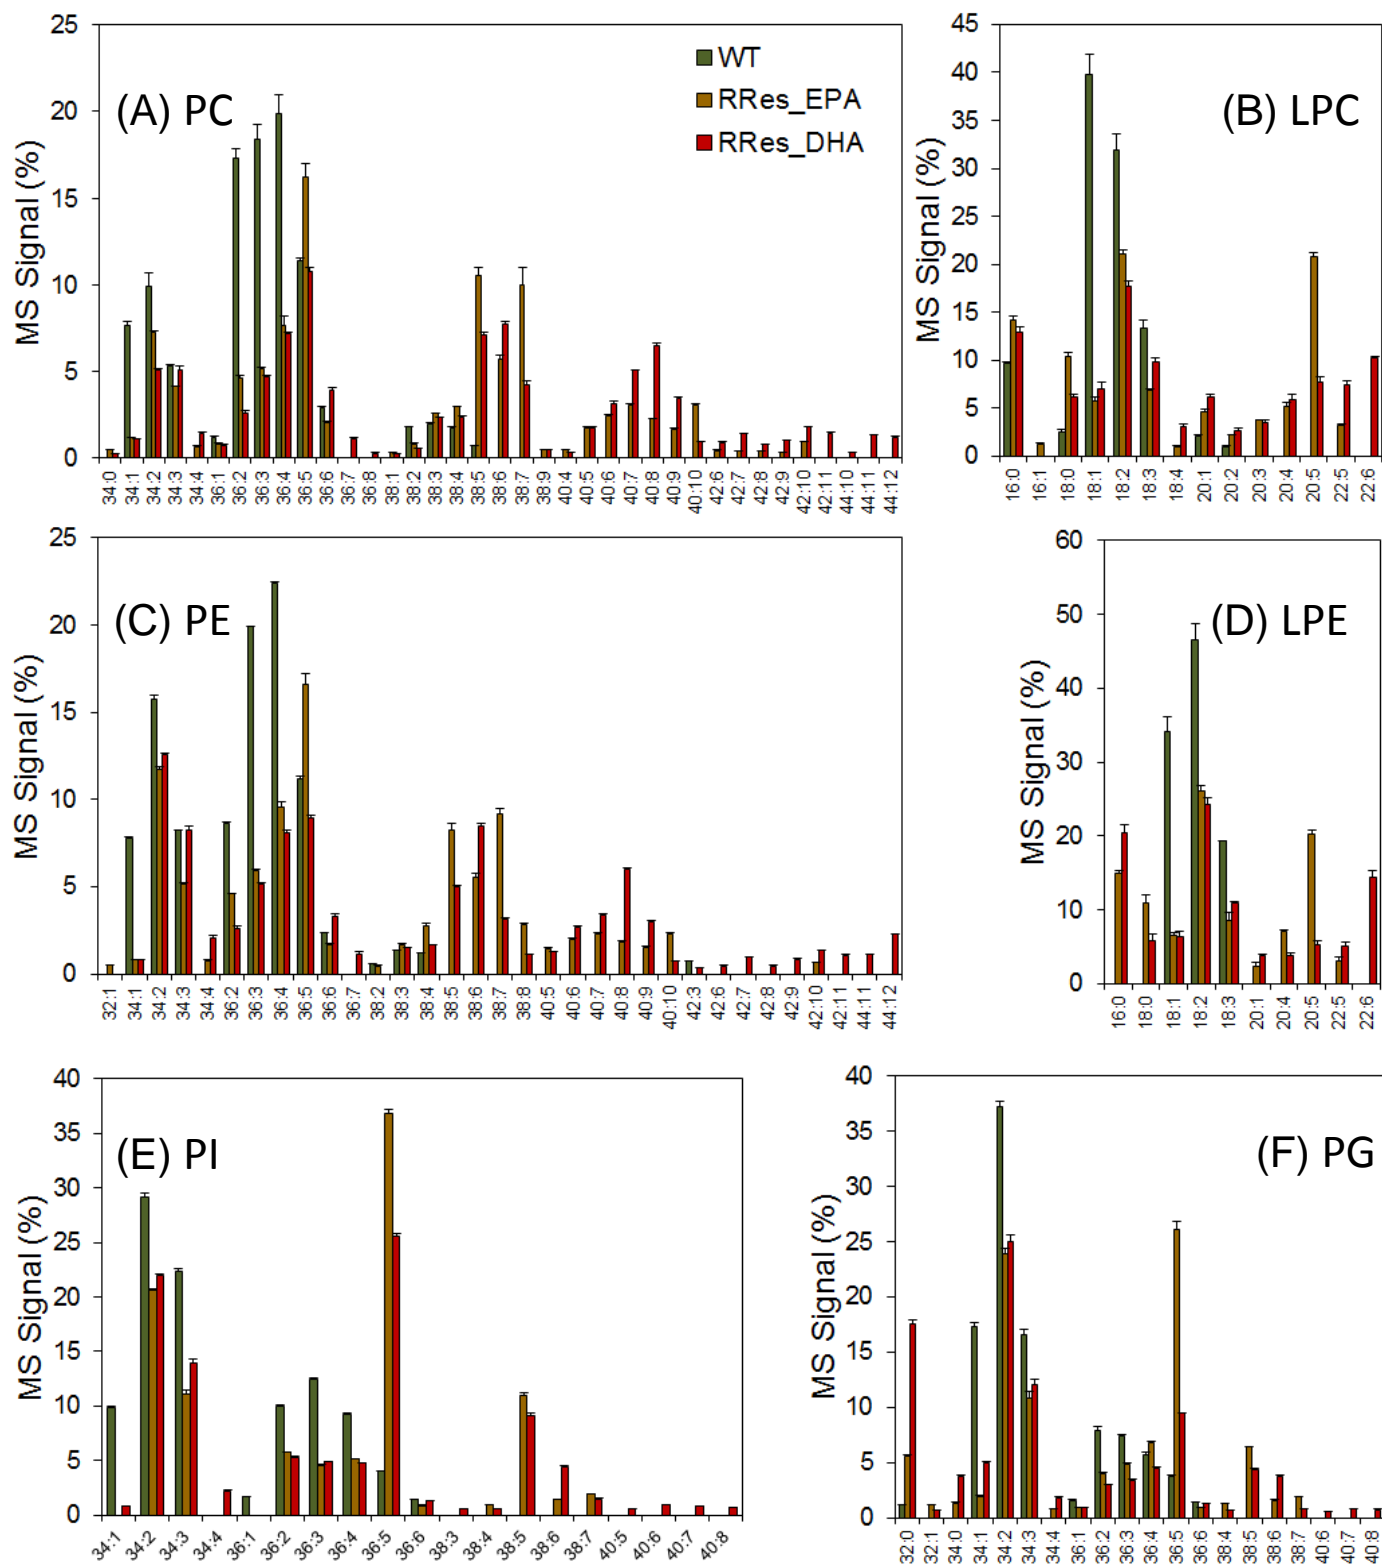

**Figure S2. Analysis of major phospholipid species in wild type and engineered mature *C. sativa* seed.** Values are means  $\pm$  SE ( $n = 3$ ). (A) PC, phosphatidylcholine; (B) lyso-PC; (C) PE, phosphatidylethanolamine; (D) lyso-PE; (E) PI, phosphatidylinositol; (F) PG, phosphatidylglycerol.

Fig. S3

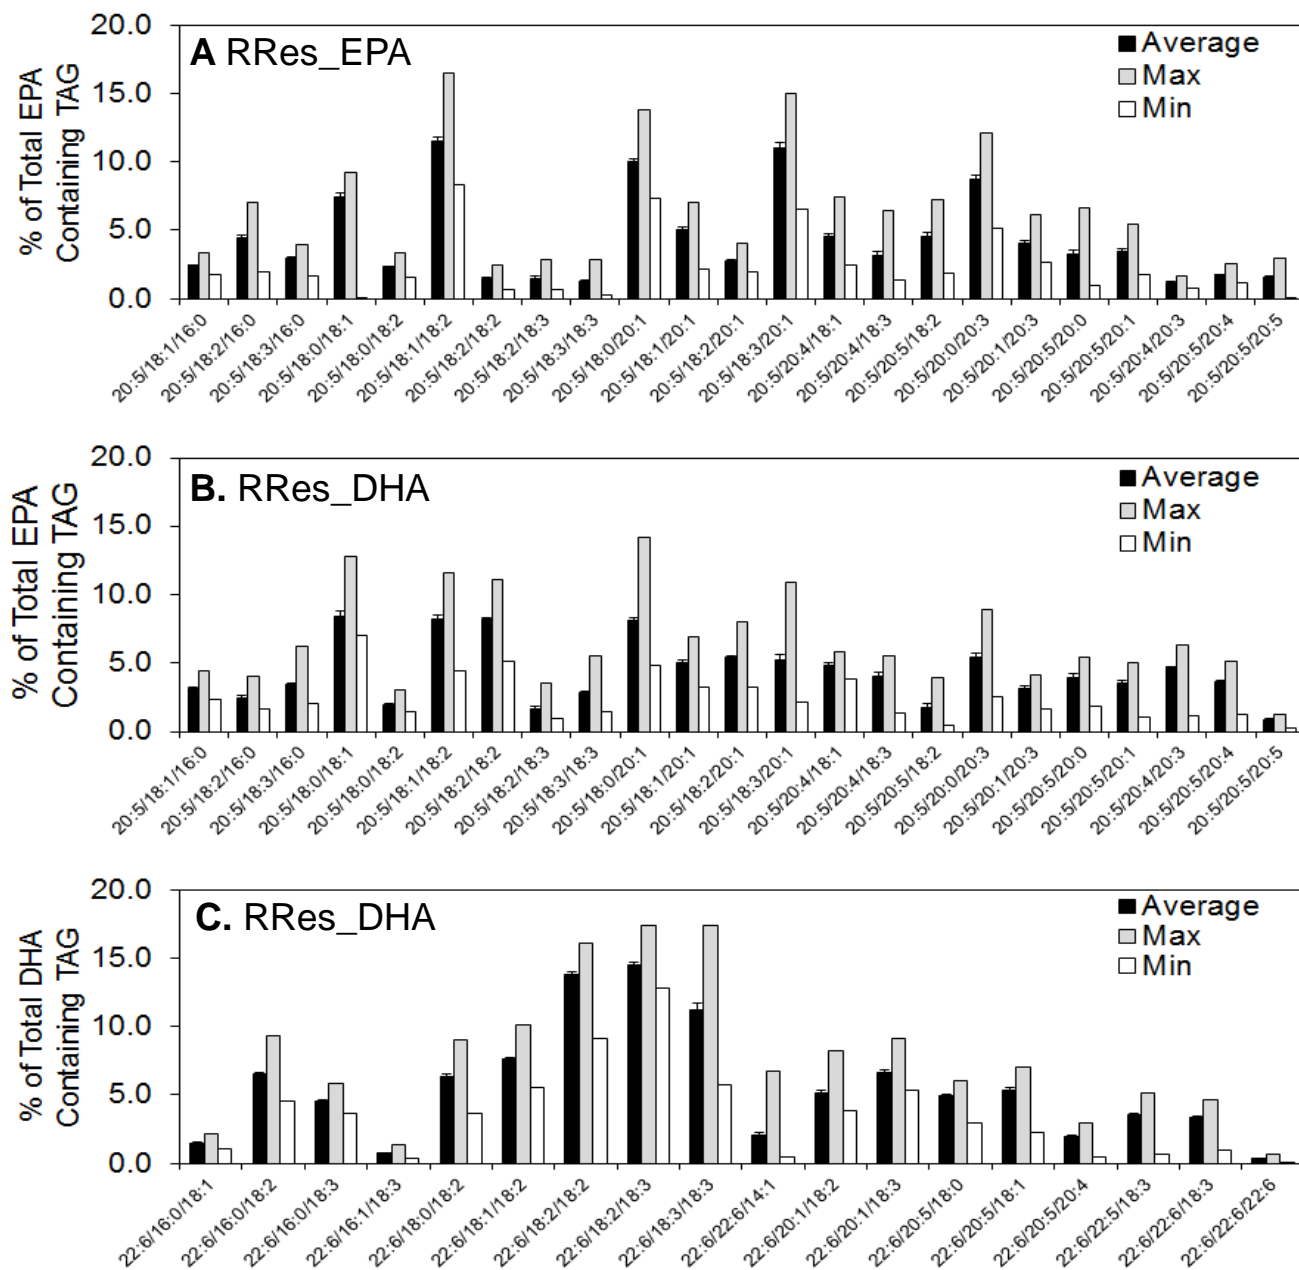

**Figure S3. LC-MS/MS +MRM analysis of TAG from *C. sativa* engineered for the production of EPA and/or DHA.** The average, maximum and minimum accumulation of the major TAG species in single seeds: (A) EPA-containing TAG in RRes\_EPA; (B) EPA-containing TAG in RRes\_DHA and (C) DHA-containing TAG in RRes\_DHA.

Fig. S4

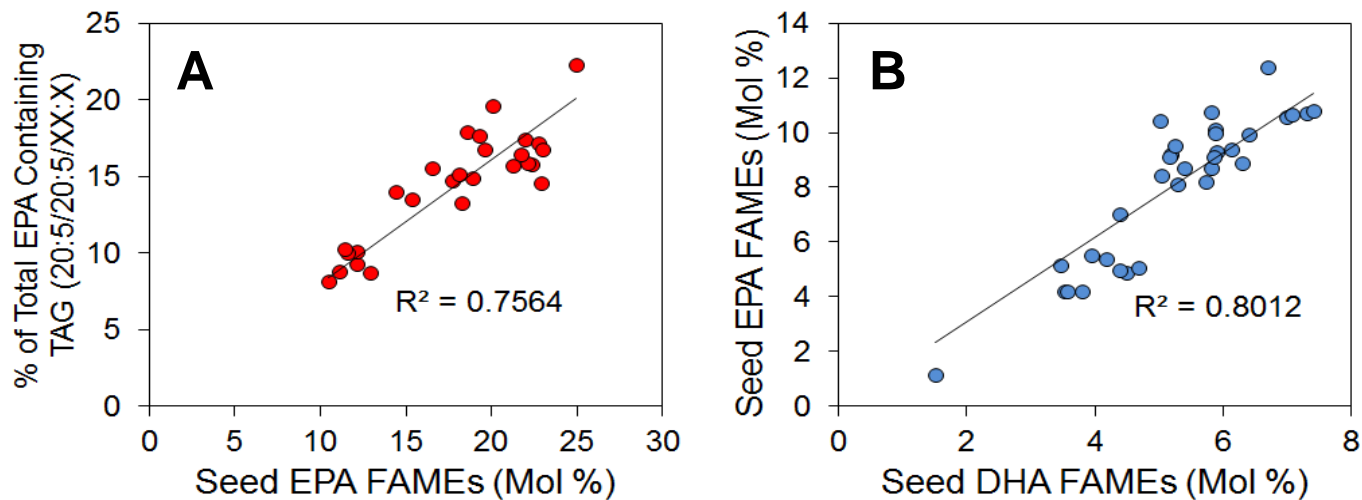

**Figure S4. The parallel analysis (GC-FID) of FAMES derived from the single seed LC-MS/MS TAG analysis. (A)** The relationship in RRes\_EPA seed between EPA content and TAG species containing two or more molecules of EPA. **(B)** The capacity of *C. sativa* RRes\_DHA TAG to accumulate high levels of both EPA and DHA.

Fig. S5

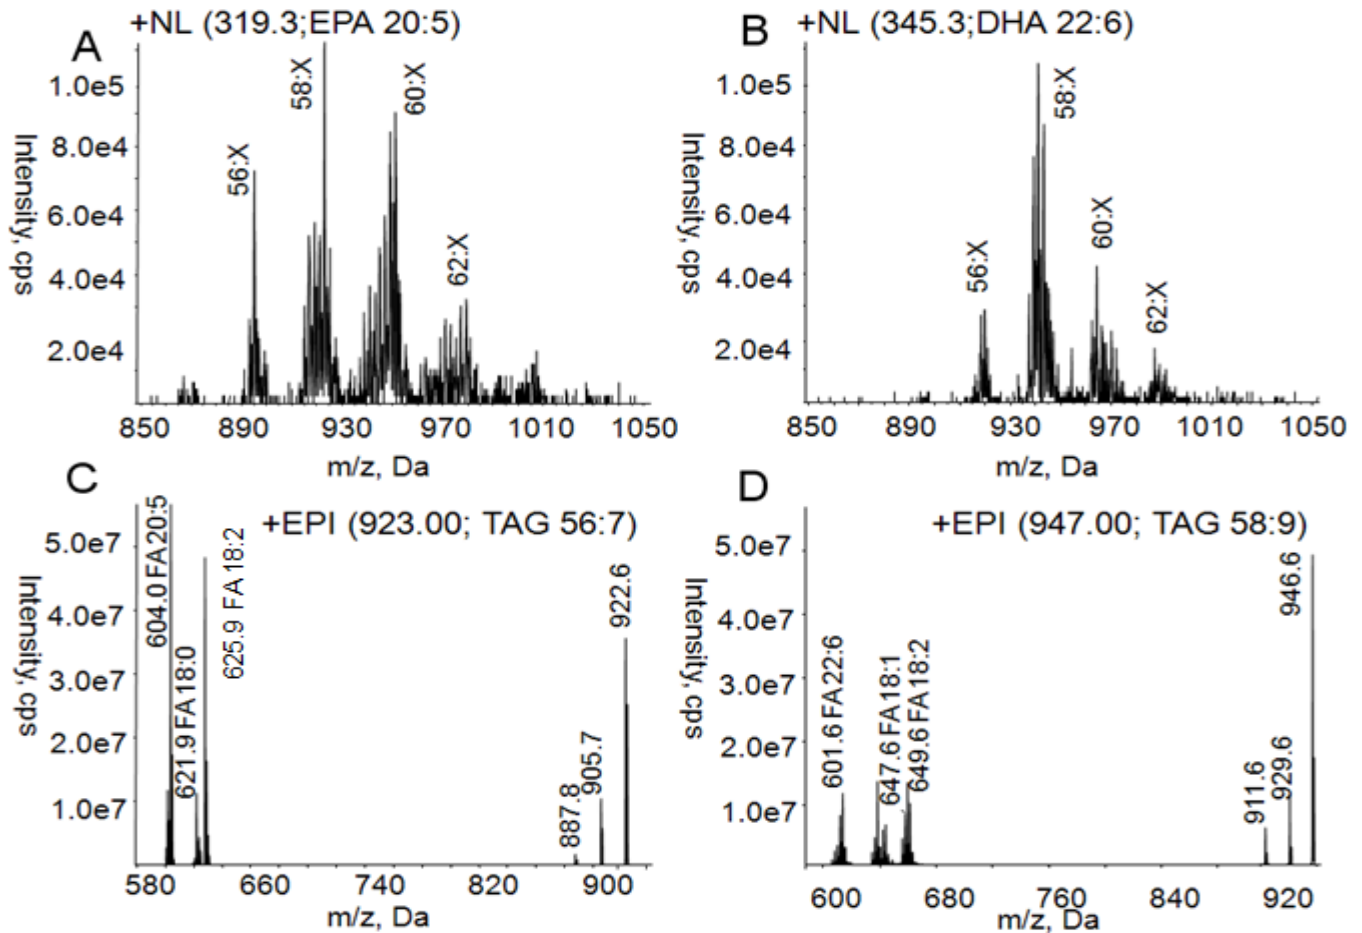

**Figure S5. The application of mass spectrometry to identify TAG molecular species containing EPA and/or DHA.** A direct-infusion electrospray ionization-tandem mass spectrometry approach was used to characterise those TAG molecular species in seed oil containing EPA and/or DHA. Initial scans targeted the neutral loss of (A) EPA 319.3 m/z and (B) DHA 345.3 m/z. For each of the major TAG species identified, enhanced product ion scans were then used to determine the fatty acid composition, illustrated here for TAG 56:7 (C) and TAG 58:9 (D). This information was then used to design individual MRM for each TAG as described in the Experimental Procedures.
